# Supplementary material for: Applying targeted next generation sequencing to dried blood spot specimens from suspicious cases identified by tandem mass spectrometry-based newborn screening
Source: publisher site journal article supplement (doi:10.1515/jpem-2017-0003), 2017-01-01
Supplement: Supplementary file 1 [file Supplemental_Figure_1-Flow-chat_of_sample_sorting_for_AngelCare_assay.pdf › Supplemental_Figure_1-Flow-chat_of_sample_sorting_for_AngelCare_assay.pdf]

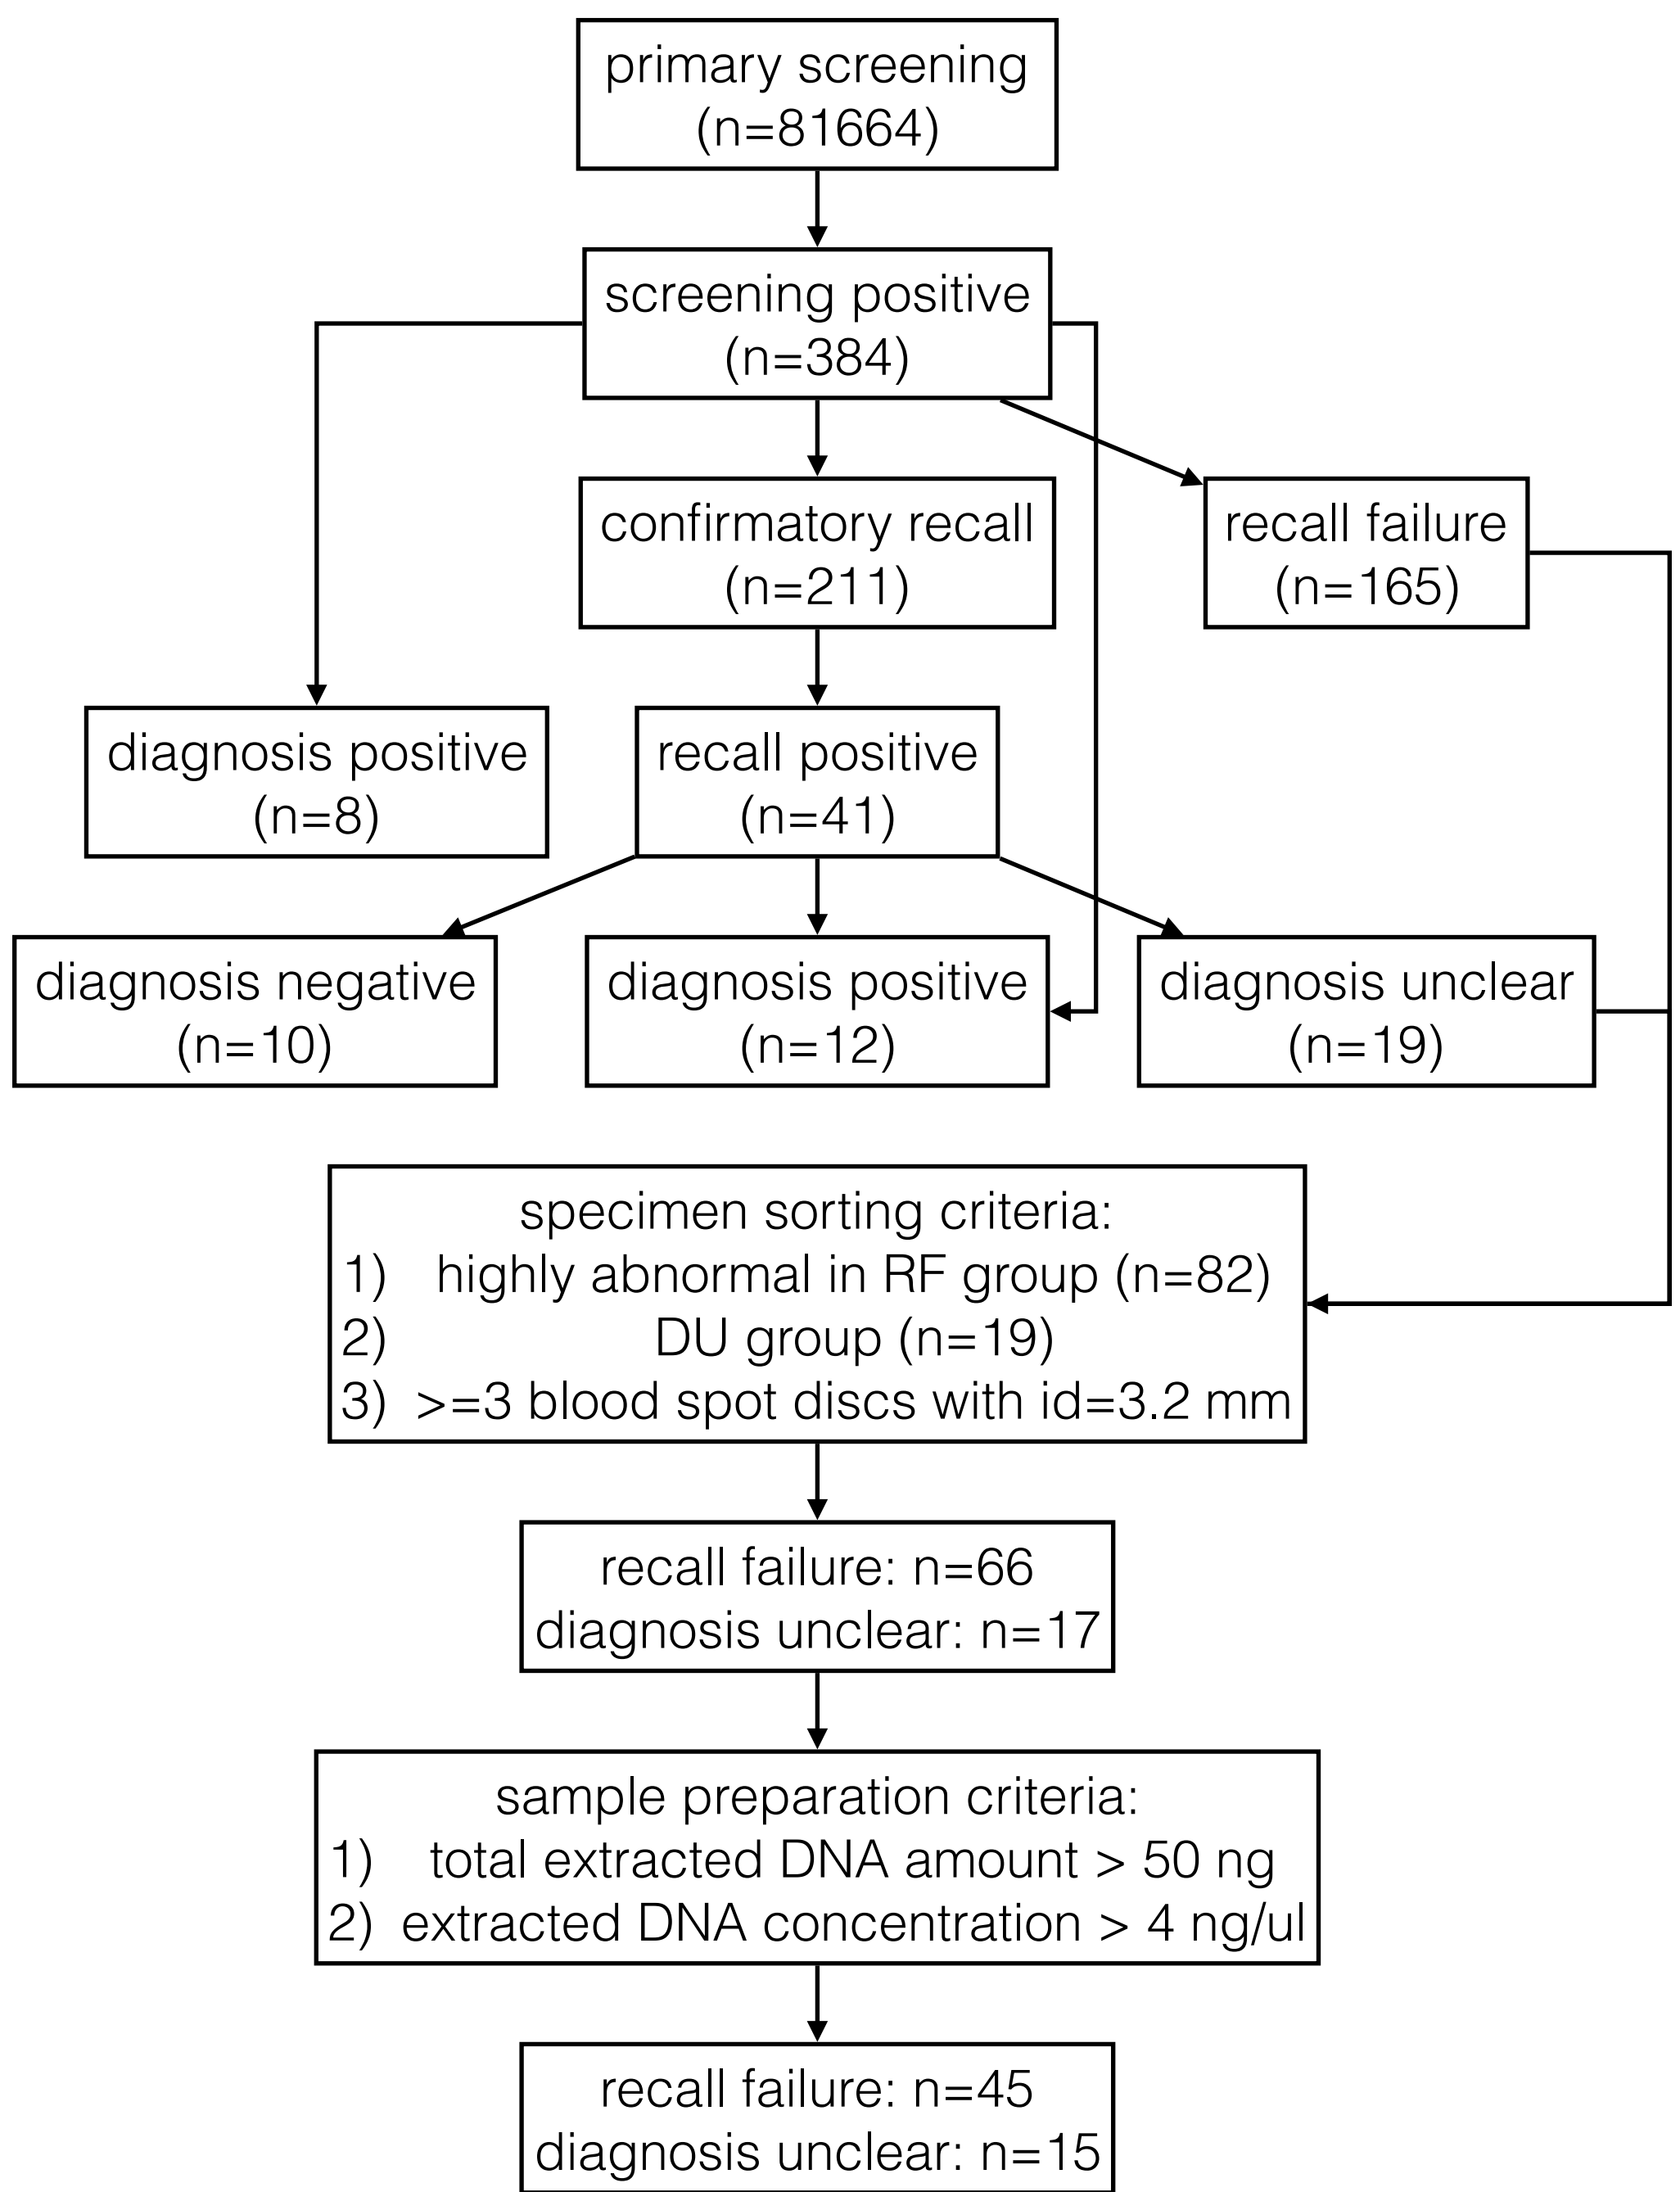

Suppl. Figure 1. Flow-chat of sample sorting for AngelCare assay. RF: recall failure; DU: diagnosis unclear
