# Supplementary material for: Applying targeted next generation sequencing to dried blood spot specimens from suspicious cases identified by tandem mass spectrometry-based newborn screening
Source: publisher site journal article supplement (doi:10.1515/jpem-2017-0003), 2017-01-01
Supplement: Supplementary file 1 [file Supplemental_Table_1-TMS_screeng_results_of_60_cases.xlsx]

## Sheet: Sheet1
Supplimental table 1: TMS screeng results of 60 cases (Cutoff Values for Mildly and Highly Abnormal TMS Results)
Sample ID	Sample No.	Sex	Age (d)	Suspected IEMs	Abnormal Primary Result	Abnormal Confirmatory Result	Mildly Abnormal Cutoffs	Highly Abnormal Cutoffs	Reference Range (uM)
14S1106278	NBS1	Male	48	ARG	Arg=135.32	Arg=108.29	Arg>70	Arg>100	1-40
14S1099337	NBS2	Male	65	ARG	Arg=137.63	Arg=78.35	Arg>70	Arg>100	1-40
14S1139229	NBS3	Male	43	ARG	Arg=120.42	Arg=81.24	Arg>70	Arg>100	1-40
14S0919487	NBS4	Male	35	OA	C5OH=0.94	C5OH=1	C5OH>1	C5OH>1.5	0.05-0.6
15S6632271	NBS5	Male	58	OA	C5OH=1.59	C5OH=1.81	C5OH>1	C5OH>1.5	0.05-0.6
15S6633261	NBS6	Male	83	SCADD	C4=1.75 C4/C2=0.04	C4=1.57 C4/C2=0.04	C4>0.8 C4/C2>0.03	C4>1.2 C4/C2>0.03	0.06-0.6 0-0.03
14S0995179	NBS7	Famale	44	NICCD	Cit=495.24 Met=389.61 Tyr=266.3 Arg=157.27	Cit=453.03 Met=419.38 Tyr=255.65 Arg=214.6	Cit>70 Met>50 Tyr>200 Arg>40	Cit>100 Met>50 Tyr>200 Arg>40	4-40 10-50 25-200 1-40
15S6634029	NBS8	Famale	60	OA	C5OH=0.93 C5OH/C2=0.06	C5OH=0.85 C5OH/C2=0.06	C5OH>1 C5OH/C2>0.02	C5OH>1.5 C5OH/C2>0.02	0.05-0.6 0-0.02
15S6634221	NBS9	Famale	3	SCAD	C4=1.34 C4/C2=0.07	C4=1.2 C4/C2=0.1	C4>0.8 C4/C2>0.03	C4>1.2 C4/C2>0.03	0.06-0.6 0-0.03
13S0110974	NBS10	Famale	3	PA/MMA	C3=8.82 C3/C2=0.48	C3=4.38 C3/C2=0.74	C3>4.5 C3/C2>0.25	C3>8 C3/C2>0.4	0.47-5 0.04-0.23
15S6633853	NBS11	Male	3	CUD	C0=10.11	C0=8.09	C0<11	C0<8	11-65
13S0126237	NBS12	Male	64	CUD	C0=7.74	C0=7.88	C0<11	C0<8	11-65
15S6630389	NBS13	Famale	40	MET	Met=111.53	Met=67.51	Met>65	Met>100	10-50
14S1105598	NBS14	Famale	80	CUD	C0=6.5	C0=6.54	C0<11	C0<8	11-65
14S1103835	NBS15	Famale	63	PA/MMA	C3=9.08 C3/C2=0.35	C3=6.89 C3/C2=0.27	C3>4.5 C3/C2>0.25	C3>8 C3/C2>0.4	0.5-4.5 0.03-0.2
14S1137172	NBS16	Famale	5	MCAD	C8=0.37 C10=0.47	C8=0.04 C10=0.06	C8>0.3 C10>0.3	C8>0.5 C10>0.5	0.01-0.2 0.01-0.25
14S1138149	NBS17	Famale	57	IVA	C5=0.92	C5=0.19	C5>0.6	C5>1.2	0.04-0.4
14S1139083	NBS18	Male	3	HHH/OAT	Orn=546.83	Orn=248.88	Orn>300	Orn>450	10-250
13S0110849	NBS19	Male	5	TYR	Tyr=495.75	Tyr=72.1	Tyr>200	Tyr>400	25.6-203
15S6311111	NBS20	Famale	4	PA/MMA	C3=5.69 C3/C2=0.27	C3=1.02 C3/C2=0.1	C3>4.5 C3/C2>0.25	C3>8 C3/C2>0.4	0.5-4.5 0.03-0.2
14S1137802	NBS21	Male	3	CUD	C0=8.23	C0=33.27	C0<11	C0<8	11-65
15S6630217	NBS22	Famale	4	OA	C5OH=1.34 C5OH/C2=0.04		C5OH>1 C5OH/C2>0.02	C5OH>1.5 C5OH/C2>0.02	0.05-0.6 0-0.02
14S1103872	NBS23	Male	4	OA	C5OH=1.04 C5OH/C2=0.04		C5OH>1 C5OH/C2>0.02	C5OH>1.5 C5OH/C2>0.02	0.05-0.6 0-0.02
14S0994217	NBS24	Male	4	CUD	C0=6.47		C0<11	C0<8	11-65
14S0917288	NBS25	Famale	5	CUD	C0=3.69		C0<11	C0<8	11-65
15S6633750	NBS26	Male	3	CUD	C0=6.08		C0<11	C0<8	11-65
14S0997228	NBS27	Male	3	PA/MMA	C3=7.48 C3/C2=0.33		C3>4.5 C3/C2>0.25	C3>8 C3/C2>0.4	0.5-5.5 0.03-0.25
15S6645641	NBS28	Male	NA	PAH	Phe=289.59 Phe/Tyr=5.13		Phe>120	Phe>360	25-120 0.2-2
13S0124844	NBS29	Male	17	PAH	Phe=339.3 Phe/Tyr=4.8		Phe>120	Phe>360	25-120 0.26-1.57
14S0989235	NBS30	Famale	5	OA/FA	C16OH=0.12 C3DC=1.54 C16:1OH=1.06 C6:1=0.13		C16OH>0.2 C16:1OH>0.2	C16OH>0.4 C16:1OH>0.3	0-0.1 0.01-0.2 0.01-0.15 0-0.1
14S0990615	NBS31	Famale	4	CIT I/ASA	Cit=177.2		Cit>70	Cit>100	4-40
14S0879381	NBS32	Male	8	IVA	C5=0.92		C5>0.6	C5>1.2	0.04-0.4
14S1108369	NBS33	Famale	77	AA	Val=316.29 Phe=162.5 Orn=995.11 Tyr=213.53 Arg=98.98 Cit=66.82 Met=63.16		Val>300 Phe>120 Orn>300 Tyr>200 Arg>70	Val>400 Phe>360 Orn>450 Tyr>400 Arg>100	44-250 25-120 10-250 25-200 1-40 4-40 10-50
14S1103217	NBS34	Male	5	MA	C3DC=0.85		C3DC>0.4	C3DC>0.8	0.01-0.2
14S0915867	NBS35	Male	4	TYR	Tyr=441.53		Tyr>200	Tyr>400	25-200
14S1106808	NBS36	Male	7	MA	C3DC=0.98		C3DC>0.4	C3DC>0.8	0.01-0.2
15S6635126	NBS37	Male	3	CUD	C0=9.56		C0<11	C0<8	11-65
14S0884973	NBS38	Famale	3	IVA	C5=0.8		C5>0.6	C5>1.2	0.04-0.4
14S1101280	NBS39	Famale	4	PAH	Phe=153.61 Phe/Tyr=227		Phe>120	Phe>360	25-120 0.2-2
14S1115555	NBS40	Famale	NA	MCAD	C8=0.26 C6=0.26 C10=0.34		C8>0.3 C10>0.3	C8>0.5 C10>0.5	0.01-0.2 0.01-0.2 0.01-0.25
13S0110685	NBS41	Famale	12	TYR	Tyr=362.97		Tyr>200	Tyr>400	25.6-203
14S0611137	NBS42	Famale	NA	MCAD	C10=0.66 C6=0.26 C8=0.36		C8>0.3 C10>0.3	C8>0.5 C10>0.5	0.01-0.25 0.01-0.2 0.01-0.2
15S6324411	NBS43	Famale	18	CUD	C0=10.38		C0<11	C0<8	11-65
14S1107417	NBS44	Male	97	MET	Met=166		Met>70	Met>100	10-50
14S1107675	NBS45	Male	142	PAH	Phe=148.38		Phe>120	Phe>360	25-120
14S1107849	NBS46	Male	68	PAH	Phe=129.38		Phe>120	Phe>360	25-120
14S1107896	NBS47	Famale	4	PAH	Phe=145.02		Phe>120	Phe>360	25-120
14S1139305	NBS48	Famale	74	MET	Met=206.22		Met>70	Met>100	10-50
14S0924852	NBS49	Male	4	SCAD	C4=1.57 C4/C2=0.11		C4>0.8 C4/C2>0.03	C4>1.2 C4/C2>0.03	0.06-0.6 0-0.03
15S6634910	NBS50	Male	4	VLCAD	C14:1=3.96 C12=0.69 C14=2.29		C14:1>0.4 C14>0.5 C12>0.6	C14:1>1 C14>1 C12>1	0.02-0.4 0.02-0.6 0.05-0.5
14S0991153	NBS51	Male	5	PAH	Phe=147.05 Phe/Tyr=2.63		Phe>120	Phe>360	25-120 0.2-2
14S1106478	NBS52	Famale	6	PAH	Phe=591.93 Phe/Tyr=8.84		Phe>120	Phe>360	25-120 0.2-2
14S1099405	NBS53	Male	5	VLCAD	C16=9.65 C12=0.92 C14=4.28 C18=3.53		C18>2 C16>6 C14>0.5 C12>0.6	C18>3 C16>9 C14>1 C12>1	0.4-6 0.02-0.6 0.05-0.5 0.2-2
14S1106901	NBS54	Famale	46	PA/MMA	C3=18.13 C3/C2=1.78		C3>4.5 C3/C2>0.25	C3>8 C3/C2>0.4	0.5-5.5 0.03-0.25
14S0989796	NBS55	Famale	89	PAH	Phe=141.46 Phe/Tyr=2.63		Phe>120	Phe>360	25-120 0.2-2
15S6647277	NBS56	Male	NA	PAH	Phe=1934.22 Phe/Tyr=4.8		Phe>120	Phe>360	25-120 0.26-1.57
15S6325401	NBS57	Male	1567	PAH	Phe=1166.21 Phe/Tyr=52.46		Phe>120	Phe>360	25-120 0.2-2
15S6305233	NBS58	Male	4	CUD	C0=6.83		C0<11	C0<8	11-65
14S0609418	NBS59	Famale	3	TYR	Tyr=383.13		Tyr>200	Tyr>400	25-200
15S6643689	NBS60	Famale	126	PA/MMA	C3=6.98 C3/C2=0.58		C3>4.5 C3/C2>0.25	C3>8 C3/C2>0.4	0.5-5.5 0.03-0.25
