# Supplementary material for: Applying targeted next generation sequencing to dried blood spot specimens from suspicious cases identified by tandem mass spectrometry-based newborn screening
Source: publisher site journal article supplement (doi:10.1515/jpem-2017-0003), 2017-01-01
Supplement: Supplementary file 3 [file Supplemental_Table_2-Design_of_AngelCare_assay.xlsx]

## Sheet: 疾病
Supplemental Table 2. IEMs and genes detectable by TNGS and TMS.
No.	Diseases	Abbreviation	Genes	Inherited mode	Covered by TMS
Amino acid disorders
1	Phenylalanine Hydroxylase Deficiency	PAH	PAH	AR	Yes
2	Maple Syrup Urine Disease	MSUD	BCKDHA	AR	Yes
			BCKDHB	AR
			DBT	AR
			DLD	AR
3	Argininosuccinic Acidemia	ASA	ASL	AR	Yes
4	Citrullinemia Type I	CIT I	ASS1	AR	Yes
5	Citrin Deficiency	NICCD	SLC25A13	AR	Yes
6	Arginase Deficiency	ARG	ARG1	AR	Yes
7	Carbamoyl Phosphate Synthetase I Deficiency	CPSID	CPS1	AR	Yes
8	N-Acetylglutamate Synthase Deficiency	NAGSD	NAGS	AR	Yes
9	Ornithine Transcarbamylase Deficiency	OTCD	OTC	XL	Yes
10	Tyrosinemia Type Ⅰ	TYR I	FAH	AR	Yes
11	Tyrosinemia Type II	TYR II	TAT	AR	Yes
12	Tyrosinemia Type III	TYR III	HPD	AR	Yes
13	Tetrahydrobiopterin Deficiency	BH4D	PTS	AR	Yes
			QDPR	AR
			GCH1	AR
			PCBD1	AR
14	Homocystinuria	HCY	CBS	AR	Yes
			MTHFR	AR
			MTR	AR
			MTRR	AR
			MMADHC	AR
15	Hypermethioninemia	MET	MAT1A	AD/AR	Yes
			GNMT	AD/AR
			AHCY	AR
			ADK	AR
16	Hyperornithinemia-Hyperammonemia-Homocitrullinuria Syndrome	HHH	SLC25A15	AR	Yes
17	Gyrate Atrophy of Choroid and Retina With or Without Ornithinemia	OAT	OAT	AR	Yes
18	Nonketotic Hyperglycinemia	NKG	GLDC	AR	Yes
			AMT	AR
			GCSH	AR
19	Histidinemia	HIS	HAL	AR	Yes
20	Hypervalinemia	HVL	BCAT1	AR	Yes
			BCAT2	AR
Fatty acid oxidation disorders
1	Glutaric Acidemia Type II	MADD	ETFA	AR	Yes
			ETFB	AR
			ETFDH	AR
2	Systemic Primary Carnitine Deficiency	CUD	SLC22A5	AR	Yes
3	Long-Chain 3-Hydroxyacyl-CoA Dehydrogenase Deficiency	LCHAD	HADHA	AR	Yes
4	Medium-Chain Acyl-Coenzyme A Dehydrogenase Deficiency	MCAD	ACADM	AR	Yes
5	Trifunctional Protein Deficiency	TFP	HADHA	AR	Yes
			HADHB	AR
6	Very Long-Chain Acyl-Coenzyme A Dehydrogenase Deficiency	VLCAD	ACADVL	AR	Yes
7	Carnitine Palmitoyltransferase II Deficiency	CPT II	CPT2	AR	Yes
8	Carnitine Palmitoyltransferase 1A Deficiency	CPT1A	CPT1A	AR	Yes
9	Short-Chain Acyl-CoA Dehydrogenase Deficiency	SCADD	ACADS	AR	Yes
10	Malonyl-CoA Decarboxylase Deficiency	MA	MLYCD	AR	Yes
11	Ethylmalonic Encephalopathy	EE	ETHE1	AR	Yes
12	Carnitine-acylcarnitine Translocase Deficiency	CACT	SLC25A20	AR	Yes
13	3-Hydroxyacyl-CoA Dehydrogenase Deficiency	SCHAD	HADH	AR	Yes
14	Isobutyryl-CoA Dehydrogenase Deficiency	IBD	ACAD8	AR	Yes
15	Medium Chain 3-Ketoacyl-CoA Thiolase Deficiency	MCKAT	ACAA1	AR	Yes
			ACAA2	AR
16	2,4-Dienoyl-CoA Reductase Deficiency	DECR	NADK2	AR	Yes
Organic acid disorders
1	Propionic Acidemia	PA	PCCA	AR	Yes
			PCCB	AR
2	Isovaleric Acidemia	IVA	IVD	AR	Yes
3	3-Methylcrotonyl-CoA Carboxylase Deficiency	3-MCCD	MCCC1	AR	Yes
			MCCC2	AR
4	Glutaric Acidemia Type I	GA I	GCDH	AR	Yes
5	Beta-Ketothiolase Deficiency	BKT	ACAT1	AR	Yes
6	Multiple Carboxylase Deficiency	MCD	BTD	AR	Yes
			HLCS	AR
7	Methylmalonic Acidemia	MMA	MUT	AR	Yes
			MMAA	AR
			MMAB	AR
			MCEE	AR
			MMADHC	AR
8	Combined Methylmalonic Acidemia and Homocystinuria	MMA-HCY	MMACHC	AR	Yes
			LMBRD1	AR
			MMADHC	AR
			ABCD4	AR
9	Combined Malonic and Methylmalonic Aciduria	CMAMMA	ACSF3	AR	Yes
10	2-Methylbutyryl-CoA Dehydrogenase Deficiency	2MBCD	ACADSB	AR	Yes
11	3-Methylglutaconic Aciduria	3-MGA	AUH	AR	Yes
			DNAJC19	AR
			OPA3	AR
			TAZ	XL
			SERAC1	AR
			TMEM70	AR
			ATP5E	AR
			ATPAF2	AR
			SUCLA2	AR
12	2-Methyl-3-Hydroxybutyryl-CoA Dehydrogenase Deficiency	MHBD	HSD17B10	XL	Yes
13	3-Hydroxy-3-Methylglutaryl-CoA Lyase Deficiency	HMG-CoA	HMGCL	AR	Yes
Carbohydrate disorders
1	Glucose-6-Phosphate Dehydrogenase Deficiency	G6PD	G6PD	XL	Not
2	Hereditary Fructose Intolerance	HFI	ALDOB	AR	Not
3	Galactosemia	GALT	GALT	AR	Not
			GALE	AR
			GALK1	AR
Copper metabolism disorders
1	Wilson Disease	WD	ATP7B	XR	Not
2	Menkes Disease	MNK	ATP7A	XR	Not
Creatine metabolism
1	Creatine Deficiency Syndromes	CTD	GATM	AR	Not
			GAMT	AR
			SLC6A8	XL
Lysosomal storage diseases
1	Fabry Disease	FD	GLA	XR	Not
2	Glycogen Storage Disease Type Ia	GSDIa	G6PC	AR	Not
3	Glycogen Storage Disease Type Ib	GSDIb	SLC37A4	AR	Not
4	Glycogen Storage Disease Type II	GSD II	GAA	AR	Not
5	Mucopolysaccharidosis Type I	MPS I	IDUA	AR	Not
6	Mucopolysaccharidosis Type II	MPS II	IDS	XR	Not
7	Mucopolysaccharidosis Type IV	MPS IV	GLB1	AR	Not
			GALNS	AR
8	Mucopolysaccharidosis Type VI	MPS VI	ARSB	AR	Not
9	Krabbe Disease	GLD	GALC	AR	Not
10	Niemann-Pick Disease	NPD	SMPD1	AR	Not
			NPC1	AR
			NPC2	AR
Dyslipidemia
1	Familial Hypercholesterolemia	FH	LDLR	AD	Not
			PCSK9	AD
			APOB	AD
			LDLRAP1	AR
2	Hypertriglyceridaemia	HTG	LPL	AD/AR	Not
			APOC2	AR
			APOA5	AD/AR
			GPIHBP1	AR
			LMF1	AR
3	Sitosterolemia	STSL	ABCG5	AR	Not
			ABCG8	AR
Primary immunological deficiency
1	Severe Combined Immunodificiency	SCID	ADA	AR	Not
			AK2	AR
			CD247	AR
			CD3D	AR
			CD3E	AR
			CORO1A	AR
			DCLRE1C	AR
			IL2RG	XR
			IL7R	AR
			JAK3	AR
			LIG4	AR
			NHEJ1	AR
			PRKDC	AR
			PTPRC	AR
			RAG1	AR
			RAG2	AR
			TNFRSF4	AR
			ZAP70	AR
			PNP	AR
2	Ataxia-Telangiectasia	A-T	ATM	AR	Not
3	Nijmegen Breakage Syndrome	NBS	NBN	AR	Not
4	Cartilage Hair Hypoplasia	CHH	RMRP	AR	Not
5	X-linked Agammaglobulinemia	XLA	BTK	XR	Not
6	Familial Hemophagocytic Lymphohistiocytosis	FHL	PRF1	AR	Not
			UNC13D	AR
			STX11	AR
			STXBP2	AR
7	Autosomal Dominant Hyper IgE Syndrome	AD-HIES	STAT3	AD	Not
8	Wiskott-Aldrich Syndrome	WAS	WAS	XR	Not
9	Hyper IgM Syndrome	HIM	CD40LG	XR	Not
			AICDA	AR
			CD40	AR
10	Chediak-Higashi Syndrome	CHS	LYST	AR	Not
11	Hermansky-Pudlak Syndrome Type II	HPS	AP3B1	AR	Not
12	Griscelli Syndrome Type II	GSII	RAB27A	AR	Not
13	X-linked Lymphoproliferative Disease	XLP	SH2D1A	XR	Not
			XIAP	XR
14	ELANE-Related Neutropenia	ERN	ELANE	AD	Not
Other single-genetic disorders
1	Malignant Hyperthermia	MH	RYR1	AD	Not
			CACNA1S	AD
2	Cystic Fibrosis	CF	CFTR	AR	Not
3	Severe Myoclonic Epilepsy of Infancy	SMEI	SCN1A	AD	Not
4	Tuberous Sclerosis Complex	TSC	TSC1	AD	Not
			TSC2	AD
5	Nonsyndromic Hearing Loss and Deafness	DFNB1	GJB2	AD/AR	Not
			GJB3	AD/AR
			SLC26A4	AR
			MT-RNR1	Maternal inheritance
Abbreviations: AD, autosomal dominant; AR, autosomal recessive;
