# Supplementary material for: Applying targeted next generation sequencing to dried blood spot specimens from suspicious cases identified by tandem mass spectrometry-based newborn screening
Source: publisher site journal article supplement (doi:10.1515/jpem-2017-0003), 2017-01-01
Supplement: Supplementary file 5 [file Supplemental_Table_3-Molecular_Diagnostic_Model.xlsx]

## Sheet: 工作表1
Supplemental Table 3-Molecular Diagnostic Model.
Genotype	Zygosity	Heredity	Phenotype	Phenotype	Molecular Diagnostic Decision
AngelCare			Primary TMS	Confirmatory TMS
P/P	Hom	Dominant	Concordant	NA/A	Positive
P/P	Com Het	Dominant	Concordant	NA/A	Positive
P/P	Hom	Dominant	Discordant	NA/A	Positive
P/P	Com Het	Dominant	Discordant	NA/A	Positive
P/P	Hom	Recessive	Concordant	NA/A	Positive
P/P	Com Het	Recessive	Concordant	NA/A	Positive
P/P	Hom	Recessive	Discordant	NA/A	Positive
P/P	Com Het	Recessive	Discordant	NA/A	Positive
P/LP	Com Het	Dominant	Concordant	NA/A	Positive
P/LP	Com Het	Dominant	Discordant	NA/A	Positive
P/LP	Com Het	Recessive	Concordant	NA/A	Positive
P/LP	Com Het	Recessive	Discordant	NA/A	Positive
LP/LP	Hom	Dominant	Concordant	NA/A	Positive
LP/LP	Com Het	Dominant	Concordant	NA/A	Positive
LP/LP	Hom	Dominant	Discordant	NA/A	High Risk
LP/LP	Com Het	Dominant	Discordant	NA/A	High Risk
LP/LP	Hom	Recessive	Concordant	NA/A	Positive
LP/LP	Com Het	Recessive	Concordant	NA/A	Positive
LP/LP	Hom	Recessive	Discordant	NA/A	High Risk
LP/LP	Com Het	Recessive	Discordant	NA/A	High Risk
P/VUS	Com Het	Dominant	Concordant	NA/A	Positive
P/VUS	Com Het	Dominant	Discordant	NA/A	High Risk
P/VUS	Com Het	Recessive	Concordant	NA/A	Positive
P/VUS	Com Het	Recessive	Discordant	NA/A	High Risk
LP/VUS	Com Het	Dominant	Concordant	NA/A	Positive
LP/VUS	Com Het	Dominant	Discordant	NA/A	High Risk
LP/VUS	Com Het	Recessive	Concordant	NA/A	Positive
LP/VUS	Com Het	Recessive	Discordant	NA/A	High Risk
VUS/VUS	Hom	Dominant	Concordant	NA/A	Positive
VUS/VUS	Com Het	Dominant	Concordant	NA/A	Positive
VUS/VUS	Hom	Dominant	Discordant	NA/A	High Risk
VUS/VUS	Com Het	Dominant	Discordant	NA/A	High Risk
VUS/VUS	Hom	Recessive	Concordant	NA/A	Positive
VUS/VUS	Com Het	Recessive	Concordant	NA/A	Positive
VUS/VUS	Hom	Recessive	Discordant	NA/A	High Risk
VUS/VUS	Com Het	Recessive	Discordant	NA/A	High Risk
P/-	Het	Dominant	Concordant	NA/A	Positive
P/-	Het	Dominant	Discordant	NA/A	High Risk
P/-	Het	Recessive	Concordant	NA/A	High Risk
P/-	Het	Recessive	Discordant	NA/A	Low Risk
LP/-	Het	Dominant	Concordant	NA/A	Positive
LP/-	Het	Dominant	Discordant	NA/A	High Risk
LP/-	Het	Recessive	Concordant	NA/A	High Risk
LP/-	Het	Recessive	Discordant	NA/A	Low Risk
VUS/-	Het	Dominant	Concordant	NA/A	Positive
VUS/-	Het	Dominant	Discordant	NA/A	High Risk
VUS/-	Het	Recessive	Concordant	NA/A	High Risk
VUS/-	Het	Recessive	Discordant	NA/A	Low Risk
-/-		NA	NA	NA	Negative
-/-		NA	NA	A	Low Risk
Abbreviation: P,Pathogenic; LP, Likely Pathogenic; VUS, Variants of Uncertain Significance; Het, Heterozygote; Com Het, Compound heterozygote; Hom, Homozygote; NA, not available; A, available.
