# Supplementary material for: Applying targeted next generation sequencing to dried blood spot specimens from suspicious cases identified by tandem mass spectrometry-based newborn screening
Source: publisher site journal article supplement (doi:10.1515/jpem-2017-0003), 2017-01-01
Supplement: Supplementary file 7 [file Supplemental_Table_4-Mutations_predicted_by_PolyPhen2,SIFT_and_Mutation_Taster..xlsx]

## Sheet: 工作表1
	Supplemental Table 4. Mutations predicted by PolyPhen2，SIFT and Mutation Taster.
	Gene	Mutation at nucleotide level	Mutation at protein level	ACMG category	SIFT prediction	PolyPhen prediction	Mutation Taster prediction	UCSC	dbSNP
	CPT2	c.1711C>A	p.P571T	VUS	deleterious	probably damaging	disease causing	no rs record	no rs record
	MMACHC	c.689G>A	p.P230Q	VUS	deleterious	begnign	disease causing	no rs record	no rs record
	ACAD8	c.749A>G	p.D250G	VUS	tolerated	begnign	disease causing	no rs record	no rs record
	SLC22A5	c.1198C>T	p.R400C	VUS	deleterious	probably damaging	disease causing	no rs record	no rs record
	SLC22A5	c.1363C>A	p.P455T	VUS	deleterious	probably damaging	disease causing	no rs record	no rs record
	MCEE	c.286A>G	p.M98V	VUS	tolerated low	begnign	disease causing	no rs record	no rs record
	ATP7B	c.722A>G	p.Q241R	VUS	tolerated	begnign	disease causing	no rs record	no rs record
	Notes. The pathogenicity and conservation for the 7 VUS mutations were predicted by PolyPhen2, SIFT and Mutation Taster software. Meanwhile the 7 VUS mutations were novel due to no record founded by searching in UCSC and dbSNP database.
