# Supplementary figures and images for: Applying targeted next generation sequencing to dried blood spot specimens from suspicious cases identified by tandem mass spectrometry-based newborn screening
Source: publisher site journal article supplement (doi:10.1515/jpem-2017-0003), 2017-01-01

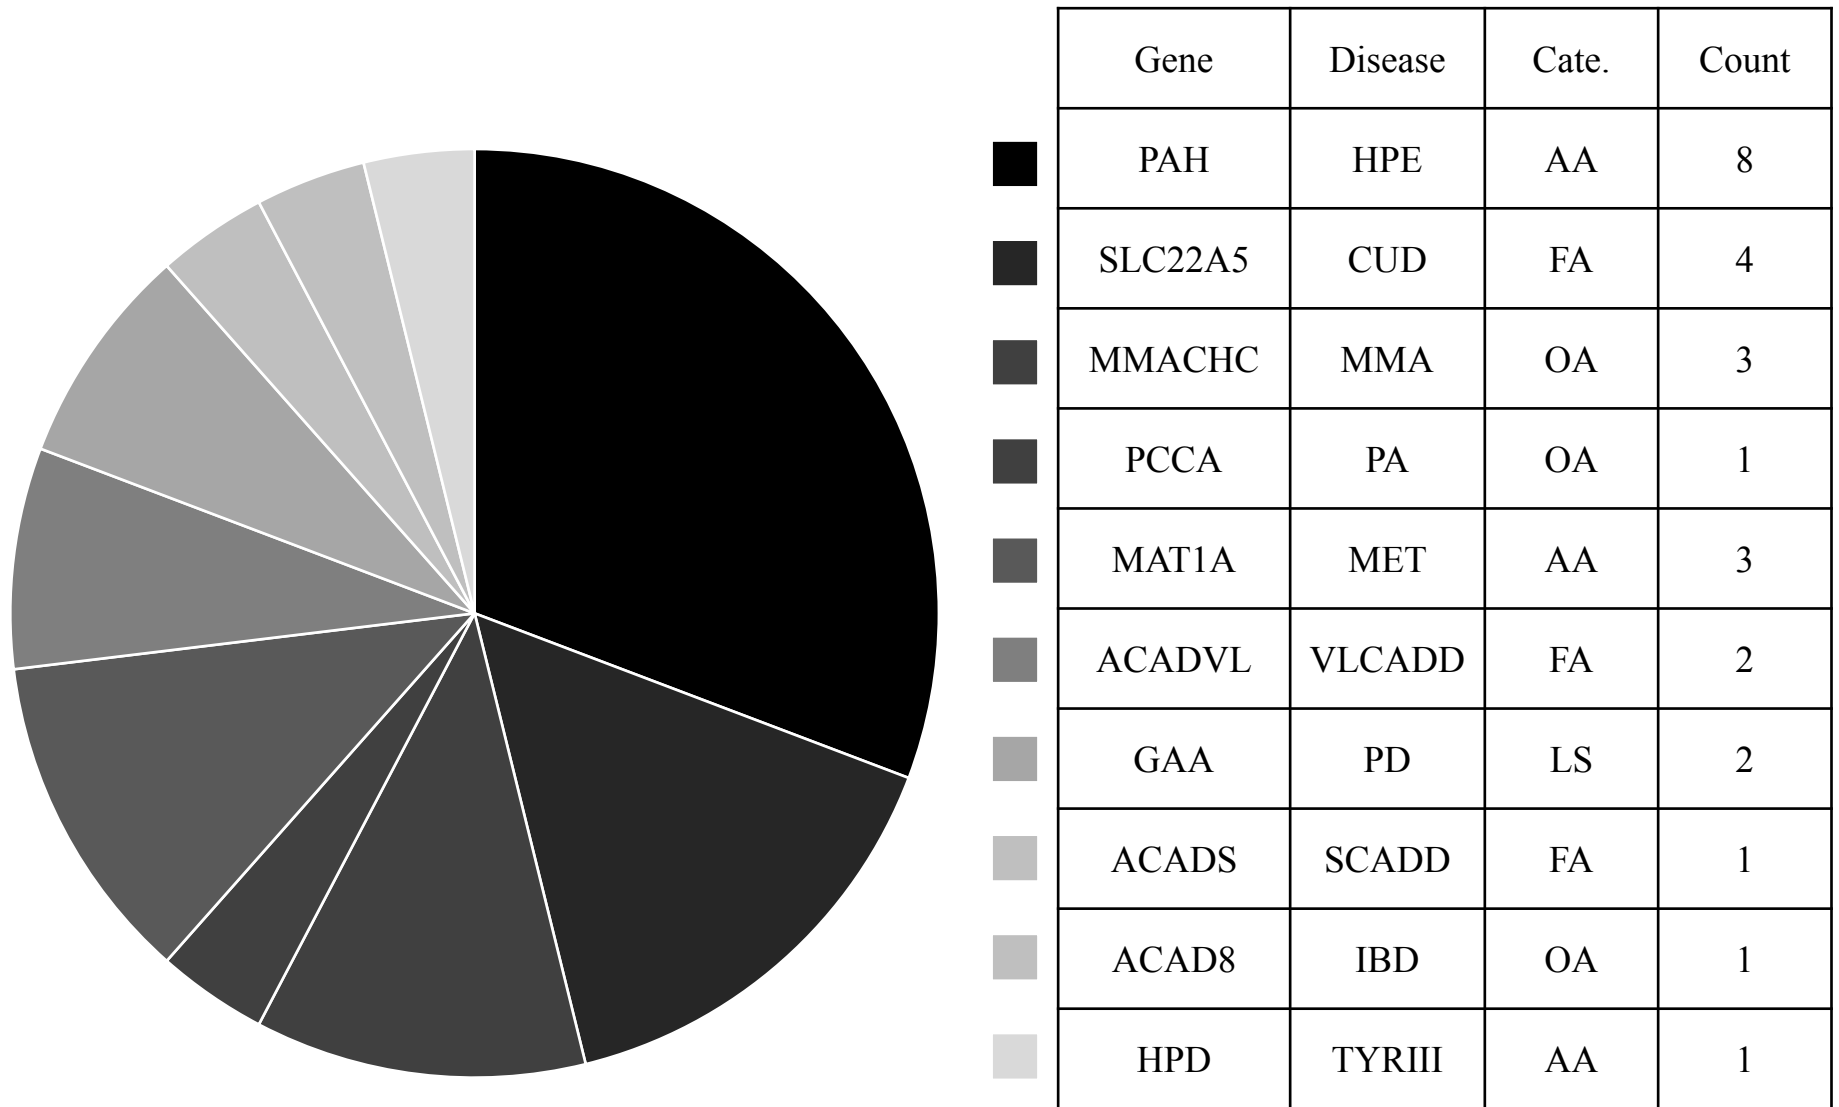

Supplemental Figure 2: Different kinds of diseases covered by positive cases.

Supplement: Supplementary file 2 [file Supplemental_Figure_2-Different_kinds_of_diseases_covered_by_positive_cases.pdf › Supplemental_Figure_2-Different_kinds_of_diseases_covered_by_positive_cases.pdf]
